# Supplementary material for: Experience of Daily Life with Generalized Myasthenia Gravis: A Qualitative Investigation and Assessment of Instrument Content Validity
Source: PubMed Central journal article supplement — Neurol Ther. 2023 Sep 25;12(6):2079–99. doi: 10.1007/s40120-023-00544-y (PMC10630275; doi:10.1007/s40120-023-00544-y), 2023-09-25
Supplement: 40120_2023_544_MOESM1_ESM.pdf [file 40120_2023_544_MOESM1_ESM.pdf]

**Supplementary Material**  
**Experience of Daily Life with Generalized Myasthenia**  
**Gravis: A Qualitative Investigation and Assessment of**  
**Instrument and Content Validity**

**Christopher Hartford, Steven Sherman, Stella Karantzoulis, Isabelle Guillemin,  
Michael Phinney, Kimberly Kelly, Kayla Negron, Shruti Raja, and Diana Rofail**

*C. Hartford, S. Sherman, D. Rofail*

*Regeneron Pharmaceuticals, Inc., Sleepy Hollow, NY, USA*

*S. Karantoulis, M. Phinney, K. Kelly, K. Negron*

*IQVIA, Durham, NC, USA*

*I. Guillemin*

*IQVIA, Lyon, France*

*S. Raja*

*Duke University Medical Center, Durham, NC, USA*

**Correspondence:** Christopher Hartford, [christopher.hartford@regeneron.com](mailto:christopher.hartford@regeneron.com)

---

**Table S1** Components of the three COAs

|                          | <b>MG-ADL</b> | <b>QMG</b>       | <b>MGC</b>            |
|--------------------------|---------------|------------------|-----------------------|
| Recall period            | 7 days        | N/A              | 7 days for PRO        |
|                          |               | Physical exam    | N/A for physical exam |
| Response options         | 0 – Normal    | 0 – None         | Differs per item      |
|                          | 1             | 1 – Mild         |                       |
|                          | 2             | 2 – Moderate     |                       |
|                          | 3 – Severe    | 3 – Severe       |                       |
| Score range <sup>a</sup> | 0–24          | 0–39             | 0–50                  |
| Number of items          | 8             | 13               | 10                    |
| Domains                  | Oropharyngeal | Ocular           | Oropharyngeal         |
|                          | Respiratory   | Bulbar           | Respiratory           |
|                          | Extremities   | Respiratory      | Ocular                |
|                          | Ocular        | Limb/gross motor | Limb/gross motor      |

COA clinical outcomes assessment *MG-ADL* Myasthenia Gravis – Activities of Daily Living

*MGC* Myasthenia Gravis Composite *N/A* not available *PRO* patient-reported outcome

*QMG* Quantitative Myasthenia Gravis

<sup>a</sup>Higher scores indicate more severe impairment

**Table S2** Literature review strategy

| Search strings | Search terms used in PubMed                                                                                                                                                                                                                                                                                                                                                                                                                                                                                                                                                                        |
|----------------|----------------------------------------------------------------------------------------------------------------------------------------------------------------------------------------------------------------------------------------------------------------------------------------------------------------------------------------------------------------------------------------------------------------------------------------------------------------------------------------------------------------------------------------------------------------------------------------------------|
| 1              | "myasthenia gravis" [All Fields]                                                                                                                                                                                                                                                                                                                                                                                                                                                                                                                                                                   |
| 2              | qualitative[Title/Abstract] OR (interview*[Title/Abstract]) OR (narratives[Title/Abstract]) OR (narration[Title/Abstract]) OR ("focus group*[Title/Abstract]) OR ("patient experience"[Title/Abstract]) OR ("experience of patient*[Title/Abstract]) OR (grounded[Title/Abstract]) OR (phenomenological[Title/Abstract]) OR (endpoint model*[Title/Abstract]) OR (concept*[Title/Abstract]) OR ("patient report*[Title/Abstract]) OR ("patientreport*[Title/Abstract]) OR ("self-report*[Title/Abstract]) OR ("self report*[Title/Abstract])                                                       |
| 1 AND 2        | ("myasthenia gravis"[All Fields]) AND ((((((((((((((qualitative[Title/Abstract]) OR (interview*[Title/Abstract]) OR (narratives[Title/Abstract]) OR (narration[Title/Abstract]) OR ("focus group*[Title/Abstract]) OR ("patient experience"[Title/Abstract]) OR ("experience of patient*[Title/Abstract]) OR (grounded[Title/Abstract]) OR (phenomenological[Title/Abstract]) OR (endpoint model*[Title/Abstract]) OR (concept*[Title/Abstract]) OR ("patient report*[Title/Abstract]) OR ("patient-report*[Title/Abstract]) OR ("self report*[Title/Abstract]) OR ("self report*[Title/Abstract]) |
| Filters        | Abstract, English, Humans                                                                                                                                                                                                                                                                                                                                                                                                                                                                                                                                                                          |

The inclusion and exclusion criteria applied to the electronic database searches included:

- **Inclusion criteria**

- Qualitative studies (interviews with patients including interviews during instrument development)
- Adult population with myasthenia gravis (MG)
- MG should be the primary topic of the article
- Patients' reports of any point of view regarding MG (impact of the disease on the patients, signs, and symptoms)

- **Exclusion criteria**

- Primarily focus on the pathogenesis, genetics, or molecular biology of MG
- Primarily focus on treatments of MG or treatment efficacy
- Non-peer reviewed research

**Fig. S1** Selection process for the targeted literature review

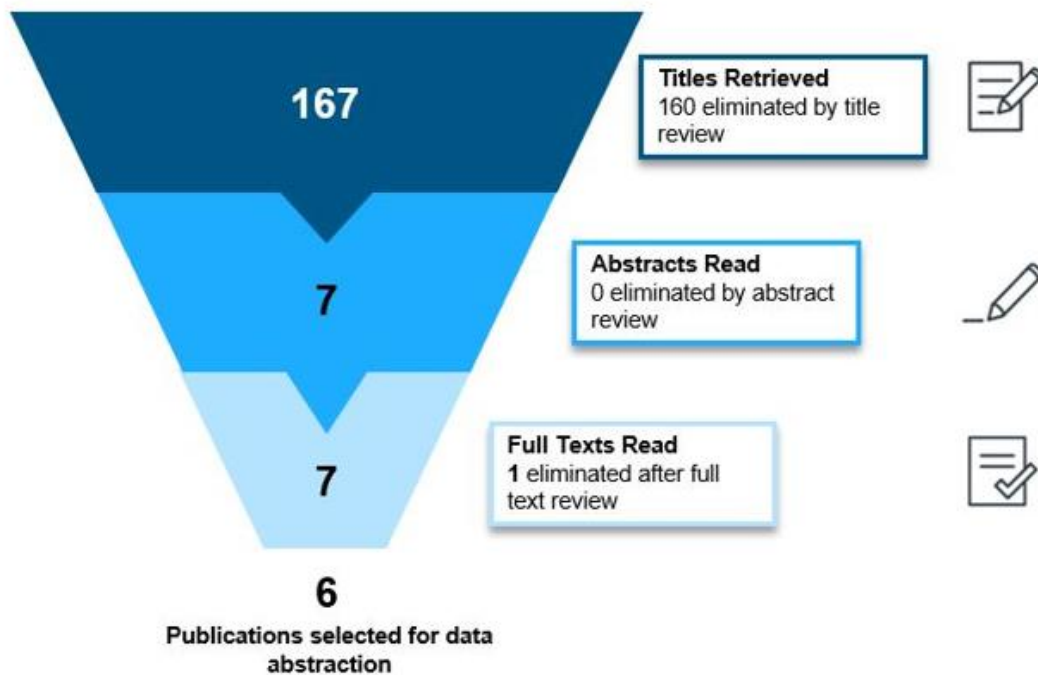

Of the 167 initial results, 160 articles with titles that were not related to “myasthenia gravis” were excluded. None of the remaining abstracts were found to include non-peer reviewed research, therefore, no further articles were excluded at this stage. Full texts were reviewed for the remaining seven articles; one was excluded, as it was not a qualitative study and did not contain any patient quotes. One additional paper, published after the original database searches were performed, was later included due to its direct relevance to the study parameters [1]. Therefore, a total of seven articles were included in the final literature review.

**Table S3** Qualitative studies selected for in-depth review and data extraction

Understanding existing qualitative research is paramount as a first step to understanding the patient voice. Accordingly, the seven articles reviewed all included patient interview studies in which patients were either directly asked about their experiences with MG, including symptoms and impacts [1-6] or were asked to provide input (i.e., cognitive debrief) regarding items for an MG instrument designed by researchers [1, 7]. Given the paucity of the qualitative studies uncovered in this review, all seven articles in **Table S2** were reviewed in-depth, and data about the signs, symptoms, and impacts described therein were extracted.

|                           | Cleanthous 2021 [1]                                                                                                                       | Chen 2013 [2]                                                                                                                             | Kabasawa 2013 [3]                                                                              | Barnett 2014[4]                                                                                                             | Richards 2014 [5]                                                   | Raggi 2014 [6]                                                                                                                 | Barnett 2016 [7]                |
|---------------------------|-------------------------------------------------------------------------------------------------------------------------------------------|-------------------------------------------------------------------------------------------------------------------------------------------|------------------------------------------------------------------------------------------------|-----------------------------------------------------------------------------------------------------------------------------|---------------------------------------------------------------------|--------------------------------------------------------------------------------------------------------------------------------|---------------------------------|
| <b>Interview type</b>     | In-depth patient interviews, cognitive debriefing interviews, clinical trial exit interviews                                              | In-depth patient interviews                                                                                                               | In-depth patient interviews                                                                    | Semi-structured interviews                                                                                                  | Online questionnaire with open-ended questions                      | Selection of concepts by patients from a list developed from literature search (Delphi-similar)                                | Cognitive debriefing interviews |
| <b>Study objective</b>    | Develop the MG symptom PRO to assess key aspects of MG severity from the patient perspective                                              | Explore the illness experience of patients with MG, their experiences of illness, its challenges, and their coping and support strategies | Investigate the prevalence and clinical characteristics of taste disorders in patients with MG | Explore the MG patient experience and related impairments                                                                   | Investigate the psychosocial impact of ptosis as a symptom of MG    | Develop a preliminary version of a disease-specific, patient-reported disability assessment instrument for MG based on the ICF | Cognitive interview of the MGII |
| <b>Number of patients</b> | 103                                                                                                                                       | 9                                                                                                                                         | 371                                                                                            | 20                                                                                                                          | 166                                                                 | 13                                                                                                                             | 13                              |
| <b>Study type</b>         | Qualitative and mixed methods psychometrics                                                                                               | Qualitative study                                                                                                                         | Epidemiological study                                                                          | Qualitative study                                                                                                           | Qualitative study                                                   | “Delphi-type” study                                                                                                            | Questionnaire development       |
| <b>Population</b>         | Patients with MG from US, UK, Canada, and Europe, mean age for wave 1 = 64.2 years, wave 2 = 66.9 years, and exit interviews = 51.9 years | Six patients with generalized MG, and three with ocular                                                                                   | Japanese patients with MG, 127 men and 244 women; mean age, 56.6 ± 16.9 years                  | MG patients representing the spectrum of the disease, median age = 62.5 years (range: 29–78); 11 (55%) patients were female | MG patients, mean age = 29.3 years with an age range of 18–63 years | MG patients, age = 29–68 years (mean 45.0, SD 11.4)                                                                            | MG patients                     |

ICF International Classification of Functioning, Disability and Health MG myasthenia gravis PRO patient-reported outcome SD standard deviation

**Table S4** Demographics and practice setting of clinicians participating in round-1 and round-2 interviews

| <b>Round-1 interviews (n = 5)</b>     |                                                            |                          |                      |                      |                    |
|---------------------------------------|------------------------------------------------------------|--------------------------|----------------------|----------------------|--------------------|
|                                       | <b>Clinician 1</b>                                         | <b>Clinician 2</b>       | <b>Clinician 3</b>   | <b>Clinician 4</b>   | <b>Clinician 5</b> |
| Specialty                             | Neurologist                                                | Neuromuscular specialist | Neurologist          | Neurologist          | Neurologist        |
| Years treating MG patients            | 23                                                         | 23                       | 33                   | 6                    | 30                 |
| Practice setting                      | Private practice                                           | Private practice         | Private practice     | Private practice     | Community hospital |
| Number of gMG patients seen per month | 8–10                                                       | 8–10                     | 20                   | 12                   | 8–9                |
| <b>Round-2 interviews (n = 4)</b>     |                                                            |                          |                      |                      |                    |
|                                       | <b>Clinician 66</b>                                        | <b>Clinician 77</b>      | <b>Clinician 88</b>  | <b>Clinician 99</b>  |                    |
| Specialty                             | Physical therapist specializing in neurological conditions | Neurologist              | Neurologist          | Neurologist          | Neurologist        |
| Years treating MG patients            | 15                                                         | 27                       | 12                   | 22                   |                    |
| Practice setting                      | Private practice                                           | Private practice         | Academic institution | Academic institution |                    |
| Number of gMG patients seen per month | 6                                                          | 6                        | 3                    | 6                    |                    |

*gMG* generalized myasthenia gravis

**Table S5** gMG symptoms mentioned by patients and corresponding bothersome ratings from round-1 interviews

| Symptom                                                      | Spontaneous vs aided mentions<br>(n = 12) |       | Total<br>(N = 12) | Bothersome rating,<br>average<br>(min:max) [n] |
|--------------------------------------------------------------|-------------------------------------------|-------|-------------------|------------------------------------------------|
|                                                              | Spontaneous                               | Aided |                   |                                                |
| <b>Respiratory muscle weakness</b>                           |                                           |       |                   |                                                |
| Shortness of breath                                          | 3                                         | 9     | 12                | 7.6 (5:10) [11]                                |
| <b>Fatigue</b>                                               |                                           |       |                   |                                                |
| General fatigue                                              | 10                                        | 1     | 11                | 7.4 (4:10) [10]                                |
| <b>Muscle fatigability</b>                                   |                                           |       |                   |                                                |
| Fatigability upon exertion                                   | 7                                         | 0     | 7                 | N/A                                            |
| Fatigability progression throughout the day                  | 6                                         | 0     | 6                 | N/A                                            |
| <b>Limb and axial weakness</b>                               |                                           |       |                   |                                                |
| Muscle weakness of legs                                      | 8                                         | 3     | 11                | 6.9 (3:10) [10]                                |
| Muscle weakness of arms                                      | 4                                         | 6     | 10                | 6.3 (4:10) [8]                                 |
| Muscle weakness of neck                                      | 4                                         | 4     | 8                 | 6.8 (5:10) [7]                                 |
| Muscle weakness of face                                      | 3                                         | 5     | 8                 | 4.1 (1:10) [6]                                 |
| Stiffness                                                    | 1                                         | 1     | 2                 | 9.5 (9:10) [2]                                 |
| <b>Bulbar muscle weakness</b>                                |                                           |       |                   |                                                |
| Difficulty swallowing (dysphagia)                            | 4                                         | 7     | 11                | 4.6 (0:10) [10]                                |
| Difficulty chewing                                           | 2                                         | 8     | 10                | 4.7 (0:10) [7]                                 |
| Poor voice quality/losing voice (dysphonia)                  | 5                                         | 4     | 9                 | 5.3 (1:10) [7]                                 |
| Speech impairment (dysarthria)                               | 4                                         | 4     | 8                 | 6.0 (2:10) [8]                                 |
| Trouble swallowing liquids                                   | 3                                         | 3     | 6                 | 5.0 [1]                                        |
| Choking                                                      | 3                                         | 3     | 6                 | 7.0 (3:10) [2]                                 |
| Trouble aspirating saliva                                    | 2                                         | 1     | 3                 | N/A                                            |
| <b>Ocular muscle weakness</b>                                |                                           |       |                   |                                                |
| Drooping upper eyelid (ptosis)                               | 4                                         | 7     | 11                | 3.4 (0:8) [9]                                  |
| Double vision (diplopia)                                     | 4                                         | 4     | 8                 | 4.4 (1:8) [7]                                  |
| Blurry vision                                                | 1                                         | 0     | 1                 | 10.0 (5:8) [1]                                 |
| <b>Sleep-related issues</b>                                  |                                           |       |                   |                                                |
| Sleep disturbance (poor sleep, excessive daytime sleepiness) | 2                                         | 1     | 3                 | 7.0 [1]                                        |
| Sleep apnea                                                  | 1                                         | 1     | 2                 | N/A                                            |

| Symptom                                         | Spontaneous vs aided mentions<br>(n = 12) |       | Total<br>(N = 12) | Bothersome rating,<br>average<br>(min:max) [n] |
|-------------------------------------------------|-------------------------------------------|-------|-------------------|------------------------------------------------|
|                                                 | Spontaneous                               | Aided |                   |                                                |
| <b>Motor function</b>                           |                                           |       |                   |                                                |
| Balance                                         | 3                                         | 1     | 4                 | 6.5 (6:7) [2]                                  |
| <b>Cognitive functioning</b>                    |                                           |       |                   |                                                |
| Brain fog/mental fatigue                        | 3                                         | 0     | 3                 | 7.7 (5:10) [3]                                 |
| Cognitive impairment                            | 1                                         | 0     | 1                 | N/A                                            |
| <b>Pain-related</b>                             |                                           |       |                   |                                                |
| Aches/pain (jaw, back)                          | 2                                         | 1     | 3                 | 6.0 [1]                                        |
| <b>Other</b>                                    |                                           |       |                   |                                                |
| Heat sensitivity                                | 6                                         | 0     | 6                 | 9.5 (9:10) [2]                                 |
| Loss of taste                                   | 1                                         | 2     | 3                 | 5.0 (0:10) [3]                                 |
| Gastrointestinal issues due to digestive issues | 2                                         | 0     | 2                 | 10.0 [1]                                       |
| Incontinence due to muscle weakness             | 1                                         | 0     | 1                 | 10.0 [1]                                       |

Concepts in blue are newly elicited in the concept elicitation patient interviews (i.e., not identified from the previously conducted literature review)

Bothersome ratings are based on the number of patients who provided a rating, which was not always the same number as those who endorsed the symptom

Symptoms were elicited spontaneously or after probing (aided). Not available (N/A) is indicated where bothersome ratings could not be obtained



**Table S6** Saturation of signs and symptoms during patient interviews

|                                                              | Group 1                                  | Group 2          | Group 3 |
|--------------------------------------------------------------|------------------------------------------|------------------|---------|
| <b>Number of patients</b>                                    | 4                                        | 4                | 4       |
| <b>Count of new concepts</b>                                 | 25                                       | 3                | 0       |
| <b>Concepts first appearing in group, %</b>                  | 89                                       | 11               | 0       |
| <b>Symptoms</b>                                              | <b>First mentioned during interviews</b> |                  |         |
| <b>Respiratory muscle weakness</b>                           |                                          |                  |         |
| Shortness of breath                                          | 12 (S = 3; P = 9)                        |                  |         |
| <b>Fatigue</b>                                               |                                          |                  |         |
| General fatigue                                              | 11 (S = 10; P = 1)                       |                  |         |
| <b>Muscle fatigability</b>                                   |                                          |                  |         |
| Fatigability upon exertion                                   | 7 (S = 7; P = 0)                         |                  |         |
| Fatigability progression throughout the day                  | 6 (S = 6; P = 0)                         |                  |         |
| <b>Limb and axial weakness</b>                               |                                          |                  |         |
| Muscle weakness of legs                                      | 11 (S = 8; P = 3)                        |                  |         |
| Muscle weakness of arms                                      | 10 (S = 4; P = 6)                        |                  |         |
| Muscle weakness of neck                                      | 8 (S = 4; P = 4)                         |                  |         |
| Muscle weakness of face                                      | 8 (S = 3; P = 5)                         |                  |         |
| Stiffness                                                    |                                          | 2 (S = 1; P = 1) |         |
| <b>Bulbar muscle weakness</b>                                |                                          |                  |         |
| Difficulty swallowing                                        | 11 (S = 4; P = 7)                        |                  |         |
| Difficulty chewing                                           | 10 (S = 2; P = 8)                        |                  |         |
| Poor voice quality/loosing voice                             | 9 (S = 5; P = 4)                         |                  |         |
| Speech impairment                                            | 8 (S = 4; P = 4)                         |                  |         |
| Trouble swallowing liquids                                   | 6 (S = 3; P = 3)                         |                  |         |
| Choking                                                      | 6 (S = 3; P = 3)                         |                  |         |
| Trouble aspirating saliva                                    | 3 (S = 2; P = 1)                         |                  |         |
| <b>Ocular muscle weakness</b>                                |                                          |                  |         |
| Drooping upper eyelid                                        | 11 (S = 4; P = 7)                        |                  |         |
| Double vision                                                | 8 (S = 4; P = 4)                         |                  |         |
| Blurry vision                                                | 1 (S = 1; P = 0)                         |                  |         |
| <b>Sleep-related issues</b>                                  |                                          |                  |         |
| Sleep disturbance (poor sleep, excessive daytime sleepiness) | 3 (S = 2; P = 1)                         |                  |         |
| Sleep apnea                                                  | 2 (S = 1; P = 1)                         |                  |         |
| <b>Cognitive functioning</b>                                 |                                          |                  |         |
| Brain fog/mental fatigue                                     | 3 (S = 3; P = 0)                         |                  |         |
| Cognitive impairment                                         | 1 (S = 1; P = 0)                         |                  |         |
| <b>Motor function</b>                                        |                                          |                  |         |
| Balance                                                      | 4 (S = 3; P = 1)                         |                  |         |

|                                                 | Group 1          | Group 2          | Group 3 |
|-------------------------------------------------|------------------|------------------|---------|
| <b>Pain-related</b>                             |                  |                  |         |
| Aches/pain (jaw, back)                          | 3 (S = 2; P = 1) |                  |         |
| <b>Other</b>                                    |                  |                  |         |
| Heat sensitivity                                |                  | 6 (S = 6; P = 0) |         |
| Loss of taste                                   |                  | 3 (S = 1; P = 2) |         |
| Gastrointestinal issues due to digestive issues | 2 (S = 2; P = 0) |                  |         |
| Incontinence due to muscle weakness             | 1 (S = 1; P = 0) |                  |         |

S spontaneous P probed

Concepts in blue are newly elicited in the concept elicitation patient interviews (i.e., not identified from the previously conducted literature review)

**Table S7** Impacts mentioned by patients and corresponding disturbance ratings during round-1 interviews

| Impact                          | Spontaneous vs aided mentions<br>(n = 12) |       | Total<br>(N = 12) | Disturbance rating,<br>average<br>(min:max) [n] |
|---------------------------------|-------------------------------------------|-------|-------------------|-------------------------------------------------|
|                                 | Spontaneous                               | Aided |                   |                                                 |
| <b>Emotional</b>                |                                           |       |                   |                                                 |
| Depression                      | 3                                         | 2     | 5                 | 6.6                                             |
| Upset about disease             | 3                                         | 0     | 3                 | N/A                                             |
| Fear/anxiety                    | 2                                         | 0     | 2                 | 8.0                                             |
| Irritation                      | 2                                         | 0     | 2                 | N/A                                             |
| Anger                           | 1                                         | 1     | 2                 | 9.5                                             |
| Frustration                     | 1                                         | 0     | 1                 | N/A                                             |
| <b>Psychosocial</b>             |                                           |       |                   |                                                 |
| Stress                          | 1                                         | 0     | 1                 | N/A                                             |
| Loss of identity                | 1                                         | 0     | 1                 | 10.0 [1]                                        |
| Self-esteem                     | 1                                         | 0     | 1                 | 3.0 [1]                                         |
| Loss of independence            | 1                                         | 0     | 1                 | 7.0 [1]                                         |
| Feeling alone/<br>misunderstood | 0                                         | 1     | 1                 | 10.0 [1]                                        |
| <b>Daily activities</b>         |                                           |       |                   |                                                 |
| Eating                          | 4                                         | 4     | 8                 | 7.0 (7:7) [2]                                   |
| Grocery shopping                | 3                                         | 0     | 3                 | 6.0 (5:7) [2]                                   |
| Housework                       | 2                                         | 0     | 2                 | 7.0 (5:9) [2]                                   |
| Getting out of bed              | 2                                         | 0     | 2                 | N/A                                             |
| Keeping up with children        | 2                                         | 0     | 2                 | N/A                                             |
| Getting into car                | 1                                         | 0     | 1                 | N/A                                             |
| Completing crafts               | 1                                         | 0     | 1                 | 3.0 [1]                                         |
| Cooking                         | 1                                         | 0     | 1                 | 6.0 [1]                                         |
| Opening mail                    | 1                                         | 0     | 1                 | N/A                                             |
| Watching TV                     | 0                                         | 1     | 1                 | N/A                                             |
| Driving                         | 0                                         | 1     | 1                 | N/A                                             |
| Difficulty with computer        | 0                                         | 1     | 1                 | N/A                                             |
| Reading                         | 0                                         | 1     | 1                 | N/A                                             |
| <b>Physical function</b>        |                                           |       |                   |                                                 |
| Difficulty walking              | 5                                         | 1     | 6                 | 8.0 [2]                                         |
| Exercising                      | 3                                         | 0     | 3                 | 8.0 [1]                                         |
| Physical yard labor             | 2                                         | 0     | 2                 | N/A                                             |
| Standing                        | 1                                         | 0     | 1                 | 10.0 [1]                                        |
| Carrying items                  | 1                                         | 0     | 1                 | 3.0 [1]                                         |

| Impact                                   | Spontaneous vs aided mentions<br>(n = 12) |       | Total<br>(N = 12) | Disturbance rating,<br>average<br>(min:max) [n] |
|------------------------------------------|-------------------------------------------|-------|-------------------|-------------------------------------------------|
|                                          | Spontaneous                               | Aided |                   |                                                 |
| Stepping up stairs                       | 1                                         | 0     | 1                 | N/A                                             |
| Weak grip/dropping item                  | 1                                         | 0     | 1                 | N/A                                             |
| Getting out of chair                     | 2                                         | 0     | 2                 | N/A                                             |
| <b>Self-care</b>                         |                                           |       |                   |                                                 |
| Brushing hair                            | 3                                         | 3     | 6                 | 6.0 (1:10) [6]                                  |
| Showering                                | 3                                         | 3     | 6                 | 5.5 (3:8) [2]                                   |
| Brushing teeth                           | 4                                         | 1     | 5                 | 6.5 (3:10) [2]                                  |
| Washing hair                             | 3                                         | 1     | 4                 | 2.0 [1]                                         |
| Hot baths                                | 2                                         | 0     | 2                 | N/A                                             |
| Putting on makeup                        | 1                                         | 0     | 1                 | N/A                                             |
| Getting dressed                          | 1                                         | 0     | 1                 | N/A                                             |
| Washing face                             | 0                                         | 1     | 1                 | N/A                                             |
| <b>Professional</b>                      |                                           |       |                   |                                                 |
| Work life                                | 7                                         | 2     | 9                 | 9.4 (7:10) [8]                                  |
| <b>Social</b>                            |                                           |       |                   |                                                 |
| Personal relationships                   | 3                                         | 5     | 8                 | 6.6 (4:9) [5]                                   |
| Family life                              | 2                                         | 4     | 6                 | 8.0 (5:10) [3]                                  |
| Participating in social activities       | 4                                         | 1     | 5                 | 10.0 [1]                                        |
| Cut out intolerant friends               | 2                                         | 1     | 3                 | N/A                                             |
| Unable to commit to plans                | 2                                         | 1     | 3                 | 9.0 [3]                                         |
| Stays to themselves                      | 2                                         | 0     | 2                 | 10.0 [1]                                        |
| Perceived by others as being intoxicated | 1                                         | 0     | 1                 | N/A                                             |
| <b>Burden</b>                            |                                           |       |                   |                                                 |
| Financial burden                         | 3                                         | 0     | 3                 | 9.5 (9:10) [2]                                  |
| Travel and time for medical appointments | 1                                         | 0     | 1                 | 4.0 [1]                                         |

Concepts in blue are newly elicited in the concept elicitation patient interviews (i.e., not identified from the previously conducted literature review)

Average disturbance ratings are based on the number of patients who provided a rating, which was not always the same number as those who endorsed the symptom

Symptoms were elicited spontaneously or after probing (aided). Not available (N/A) is indicated where disturbance ratings could not be obtained

## References

1. Cleanthous S, Mork AC, Regnault A, et al. Development of the Myasthenia Gravis (MG) Symptoms PRO: a case study of a patient-centred outcome measure in rare disease. *Orphanet J Rare Dis.* 2021;16(1):457.
  2. Chen YT, Shih FJ, Hayter M, et al. Experiences of living with myasthenia gravis: a qualitative study with Taiwanese people. *J Neurosci Nurs.* 2013;45(2):E3-E10.
  3. Kabasawa C, Shimizu Y, Suzuki S, et al. Taste disorders in myasthenia gravis: a multicenter cooperative study. *Eur J Neurol.* 2013;20(1):205-7.
  4. Barnett C, Bril V, Kapral M, et al. A conceptual framework for evaluating impairments in myasthenia gravis. *PLoS One.* 2014;9(5):e98089.
  5. Richards HS, Jenkinson E, Rumsey N, et al. The psychosocial impact of ptosis as a symptom of myasthenia gravis: a qualitative study. *Orbit.* 2014;33(4):263-9.
  6. Raggi A, Schiavolin S, Leonardi M, et al. Development of the MG-DIS: an ICF-based disability assessment instrument for myasthenia gravis. *Disabil Rehabil.* 2014;36(7):546-55.
  7. Barnett C, Bril V, Kapral M, et al. Development and validation of the Myasthenia Gravis Impairment Index. *Neurology.* 2016;87(9):879-86.
-
